# Supplementary material
Source: bioRxiv or medRxiv preprint supplement (https://www.biorxiv.org/highwire/filestream/27579/field_highwire_adjunct_files/0/097386-1.pdf)
Supplement: Supplementary file [file 097386-1.pdf]

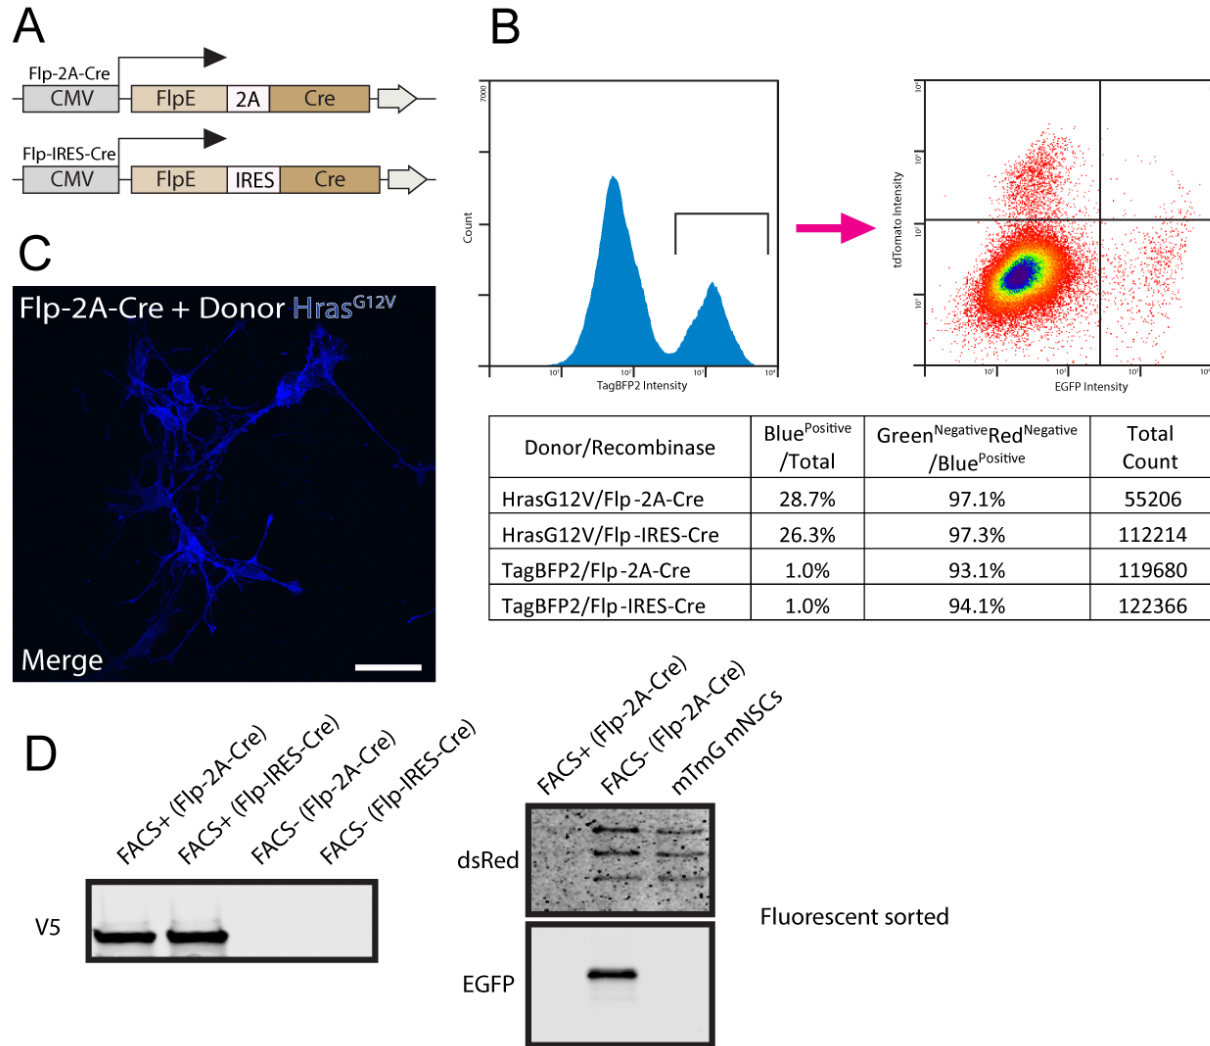

**Supplementary Figure 1: Measurement of MADR efficiency in heterozygous *mTmG* mNSCs by FACS analysis, and confirmation of correct protein translation at non-clonal population level**

- Schematic of recombinase-expressing plasmids employed in this study<sup>19</sup>.
- FACS analysis indicates the approximate MADR efficiency in neural stem cells, and no obvious difference between Flp-2A-Cre and Flp-IRES-Cre in their catalytic efficiencies
- Sorted cells express *Hras*<sup>G12V</sup> but not tdTomato or EGFP. Scale bar: 50 $\mu$ m
- Western blot indicating normal transgene production from non-clonal aggregate cells and lack thereof in FACS-negative population. Removal of tdTomato expression is also observed.

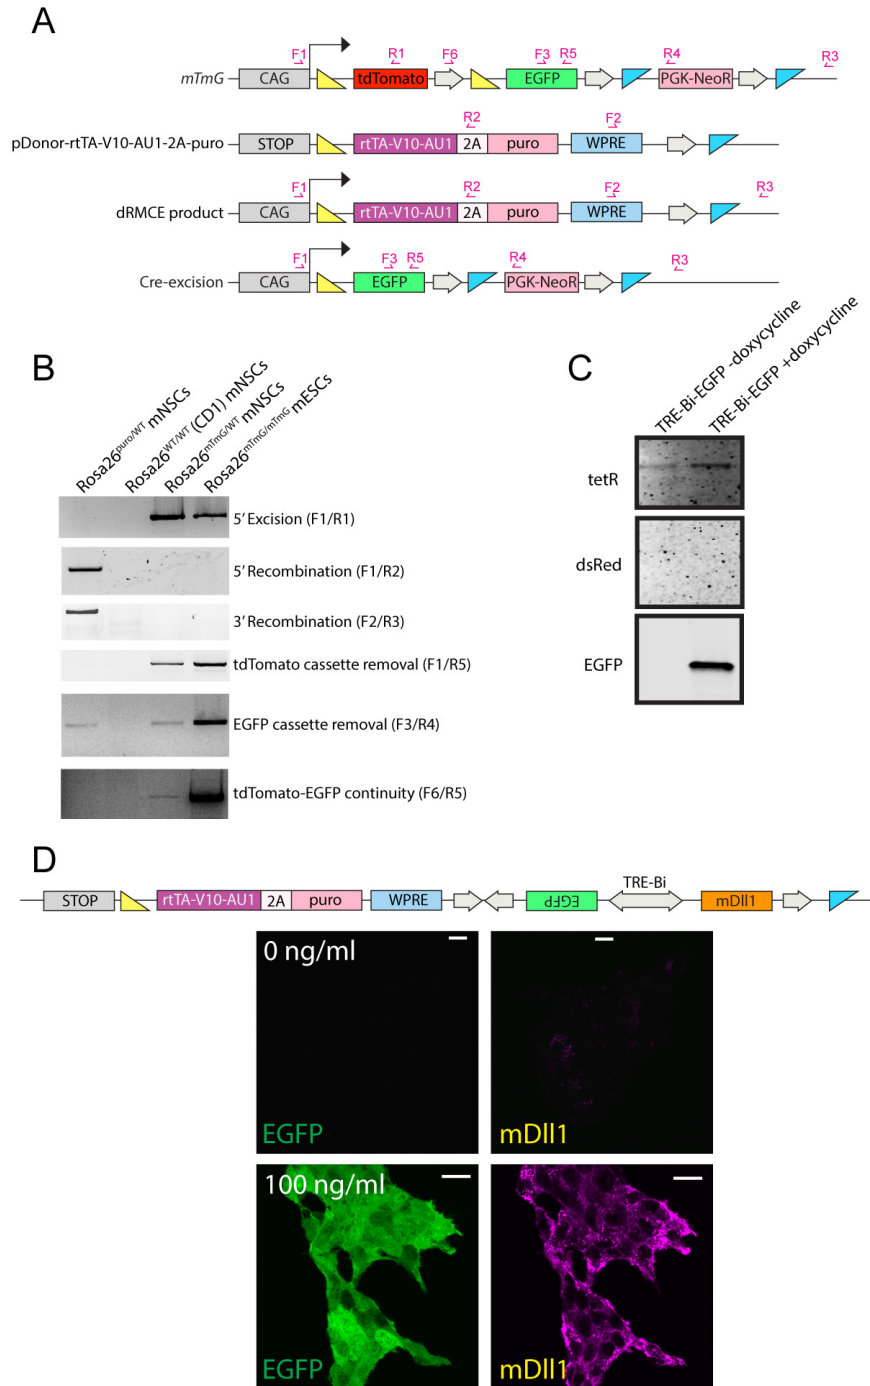

**Supplementary Figure 2: PCR screening and western blot analysis confirms MADR-mediated excision of tdTomato cassette and integration of donor cassette at *Rosa26*<sup>mTmG</sup> locus**

- Schematics of plasmids and alleles subject to PCR analysis at denoted sites. Primers used are listed in **Supplementary Table 1**
- PCR screening analysis reveals that rtTA-V10-AU1 cassette is correctly integrated downstream of CAG-promoter in cells that are resistant to puromycin treatment
- Western blot analysis of the cell line from **Fig. 2C** showing the expression of rtTA-V10-AU1 and also EGFP upon doxycycline induction
- TRE cell line with a bidirectional tet-response element that expresses EGFP and DII1 upon doxycycline treatment without leakiness or wide expression level distribution. Scale bars: 20 $\mu$ m

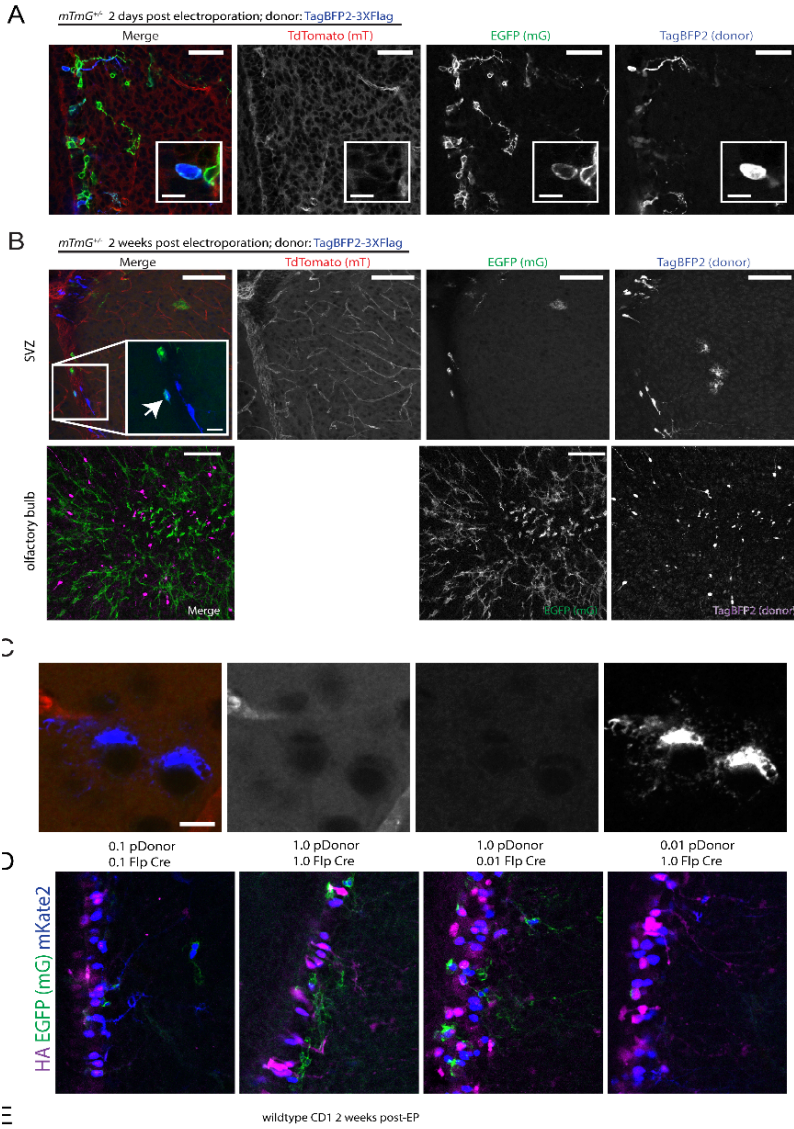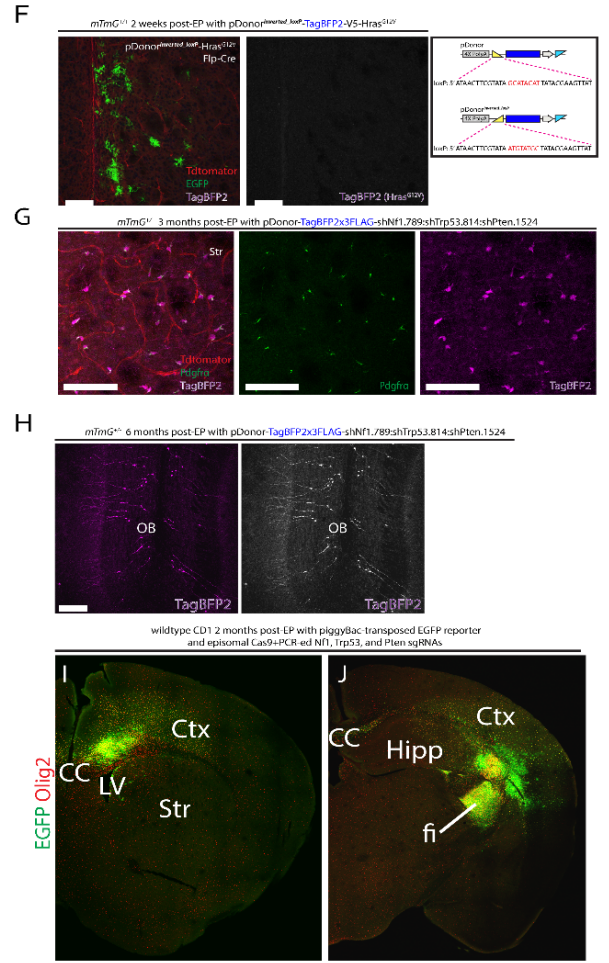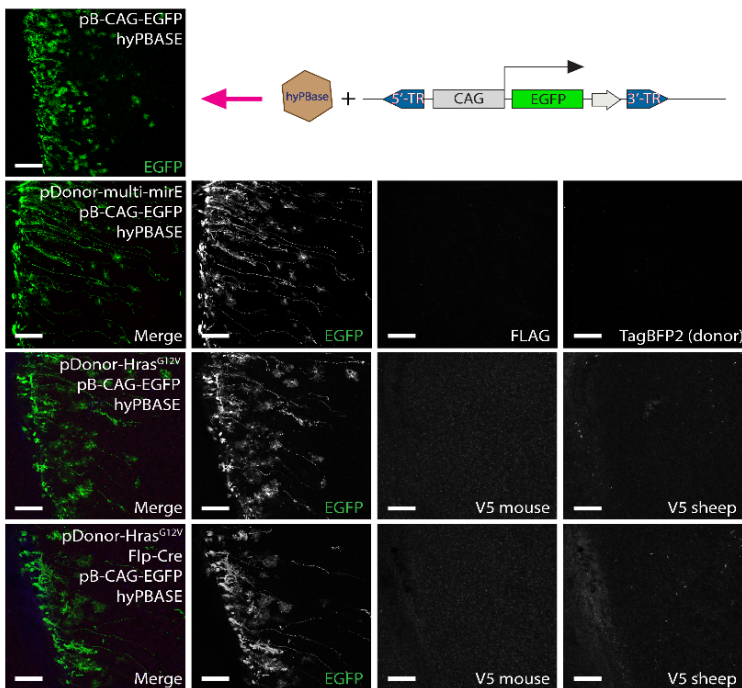

**Supplementary Figure 3: Characterization of *in vivo* MADR and control experiments confirming specificity of integration**

- A) At 2 days post-EP, cells start expressing TagBFP2. Scale bars: 50 $\mu$ m; Insets: 10 $\mu$ m
- B) Gliogenesis and radial glia 2 weeks post-EP. Arrow indicates rare green-and-blue double positive cells at the VZ. Neurons with both markers can be observed in the OB at this time point. Scale bars: 100 $\mu$ m; Inset: 20 $\mu$ m
- C) High-magnification confocal image of a pair of TagBFP2<sup>+</sup> satellite glia, which are negative for tdTomato and EGFP. Scale bars: 10 $\mu$ m
- D) Representative images of SM\_FP-HA (donor), EGFP (mG), and TagBFP2-nls (blue) from VZ of the plasmid titration quantitations depicted in **Fig. 3C**.
- E) Lineage tracing of EP-ed cells in the VZ/SVZ with hypBase-integrated EGFP reporter plus various donor vectors and recombinases do not show any integration by 2 weeks post-EP. Scale bars: 100 $\mu$ m
- F) Donor vector with inverted loxP orientation fails to express Hras<sup>G12V</sup> and does not produce hyperplasia. (For comparison of integrated plasmid at same time point, see **Supplementary Fig. 4A**.) Scale bars: 100 $\mu$ m
- G) At 3 months post-EP, cells expressing multi-miR-E tied to TagBFP2 reporter are predominantly Pdgfra<sup>+</sup> OPCs. Scale bars: 100 $\mu$ m
- H) TagBFP2<sup>+</sup> neurons in the olfactory bulb of multi-miR-E MADR mice.
- I-J) Episomal Cas9-mediated multiplex mutation of Nf1, Trp53, and Pten yield transformation of piggyBac-transposed EGFP<sup>+</sup> cells into Olig2<sup>+</sup> tumors localized near white matter tracts.

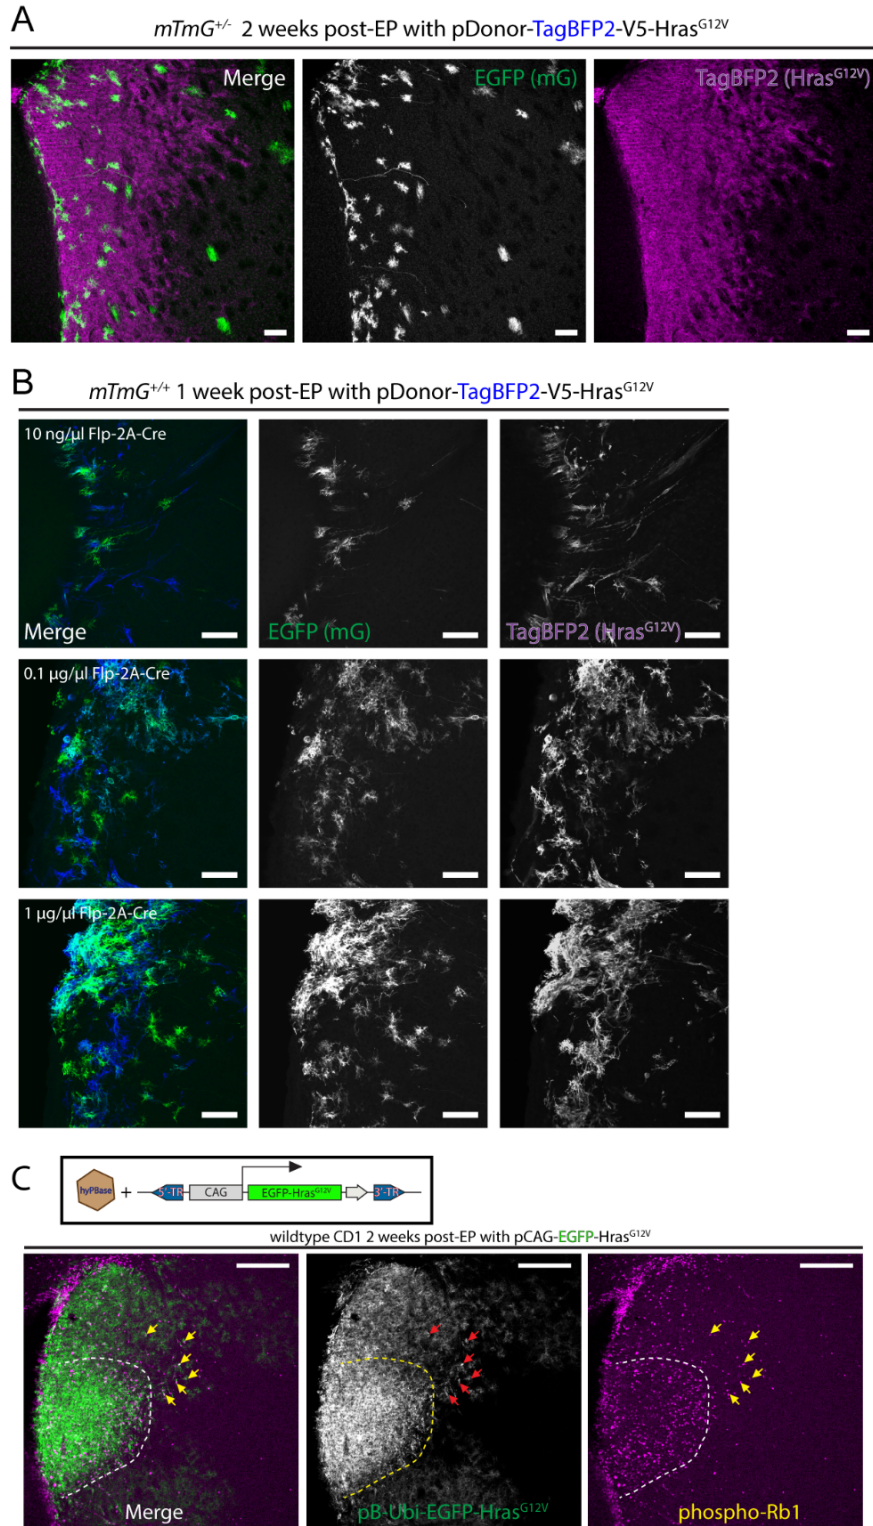

**Supplementary Figure 4: Examination of *Hras<sup>G12V</sup>*-recombined *mTmG* cells in the striatum**

- A) Two weeks post-EP shows clear lineage divergence between EGFP<sup>+</sup> cells that underwent Cre-mediated excision of tdTomato cassette and Hras<sup>G12V</sup><sup>+</sup> cells with successful MADR. Scale bars: 100 $\mu$ m
- B) As low as 10 ng/ $\mu$ l recombinase-expression vector in EP mixture can catalyze MADR *in vivo*. Scale bars: 100 $\mu$ m
- C) Brighter EGFP-*Hras<sup>G12V</sup>* cells after pBase-mediated integration express phosphorylated Rb1. Scale bars: 200 $\mu$ m

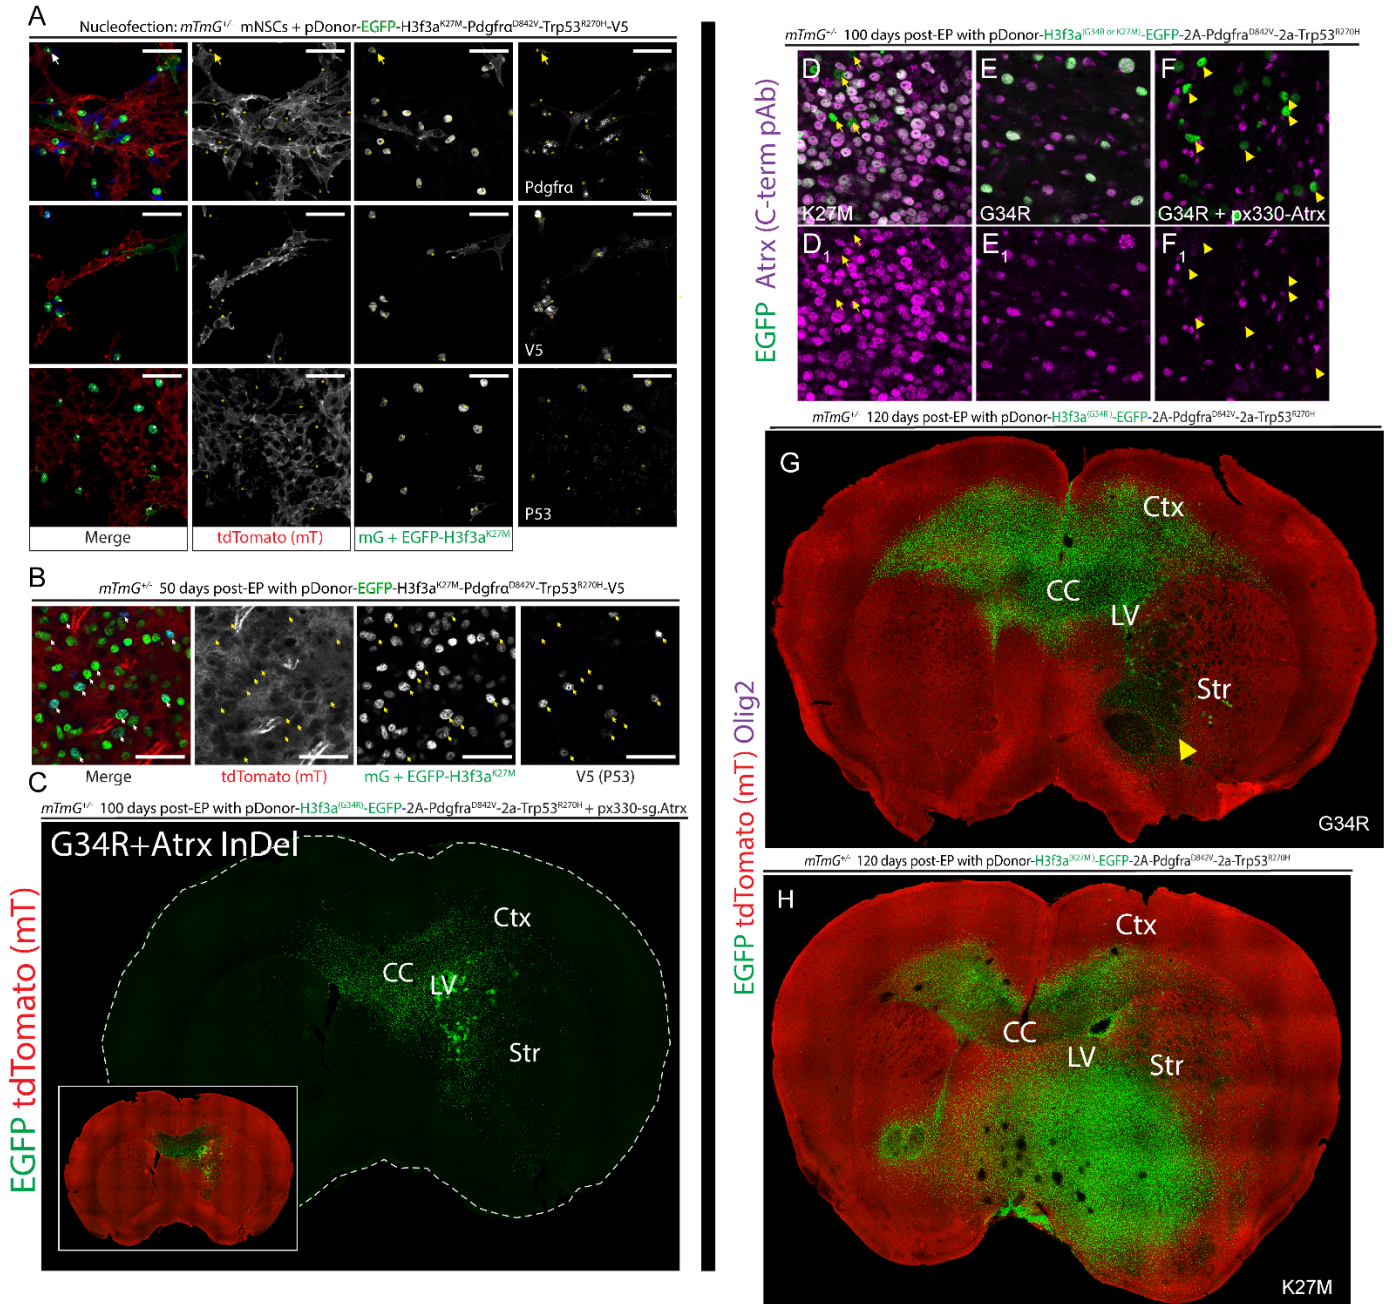

### Supplementary Figure 5: Characterization of multi-cistronic tumors.

- In vitro assessment of transgene expression after MADR in heterozygous *mTmG* mNSCs shows the co-expression of nuclear EGFP with Pdgfra, V5 (Trp53<sup>R270H</sup>), and P53. Note the presence of contaminating mG cells with membrane EGFP and no tdTomato or transgene expression. Scale bars: 50 $\mu$ m
- Confirmation of Trp53 co-expression with nuclear EGFP (H3f3a). Scale bars: 50 $\mu$ m
- Combined expression of MADR G34R/Pdgfra/Trp53 and a plasmid inducing CRISPR/Cas9-targeting of Atrx does not accelerate tumor formation
- Atrx is expressed in the majority of EGFP+ cells in K27M tumors. A small subset of EGFP+ cells (yellow arrows) has lost Atrx antigenicity.
- G34R cells at 100 days post-EP express Atrx.
- CRISPR/Cas9 targeting leads to highly efficient loss of Atrx in EPed cells.
- Cortically-infiltrating G34R tumor at 120 days post-EP.
- K27M tumor at 120 days post-EP is predominantly sub-cortical.

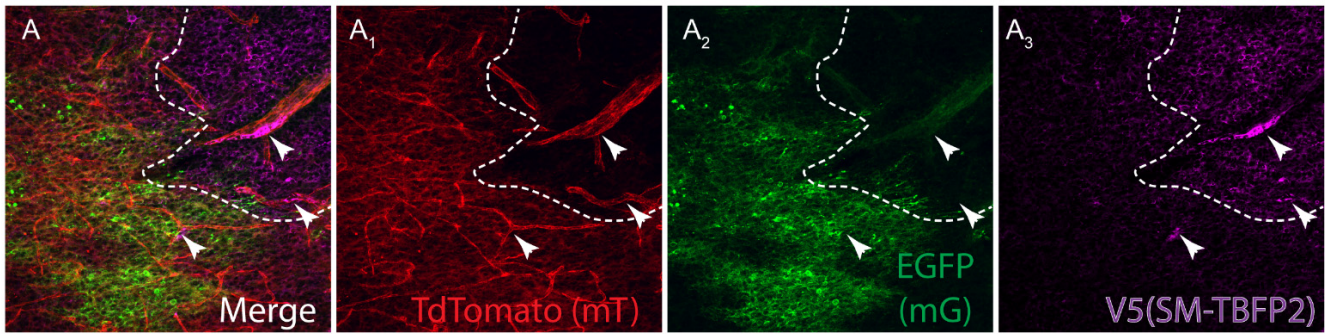

**Supplementary Figure 6: Investigation of MADR glioma.**

A) V5<sup>+</sup> tumor-derived cell populations can be found juxtaposed to the Tdtomato<sup>+</sup> vasculature in focal regions of the tumor.

Supplementary Figure 7:

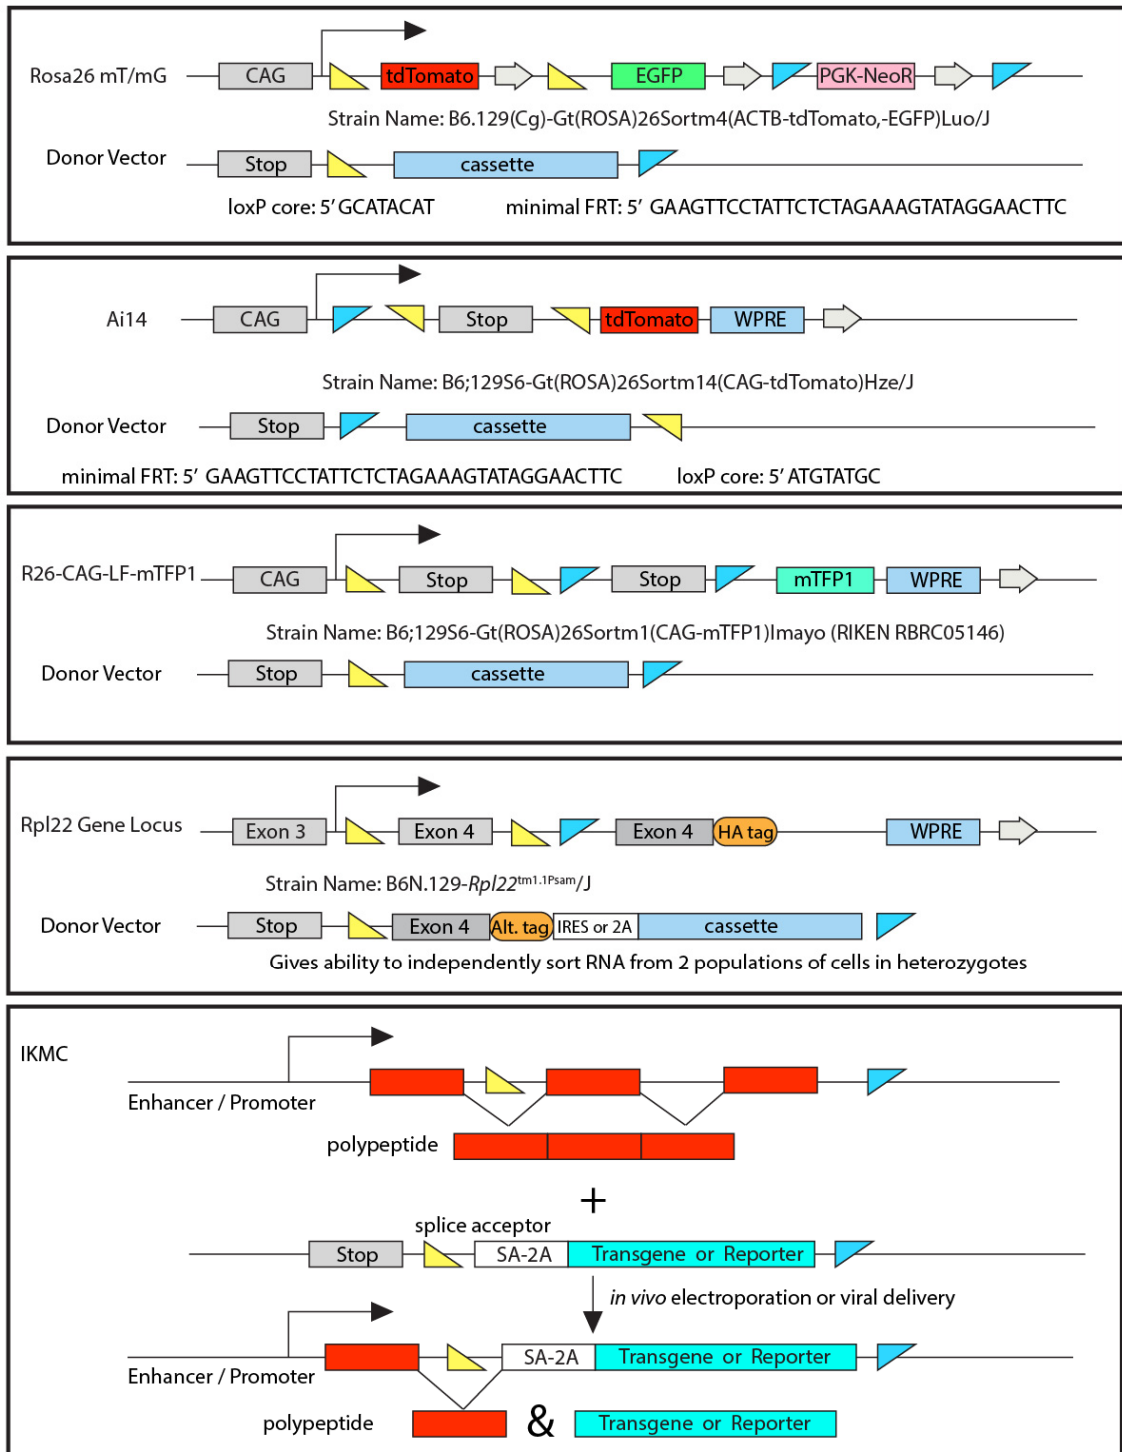

**Supplementary Figure 7: Alternative reporter mice amenable to *in vivo* MADR or MADR MAX, and extension of the method to Ribotrap and IKMC repository mouse lines with gene-trap alleles**

There are existing CAG-based reporter mice that are similar to mTmG mice in construction and compatible with *in vivo* MADR to achieve mutant lineage tracing studies or orthogonal RNA isolation using Ribotrap heterozygotes. Additionally, this method can extend to thousands of gene-trap mice that, as an example, flank loxP and FRT around important exons. *in vivo* MADR at such loci would enable 1) lineage tracing of heterozygous/homozygous null cells at the locus, as well as 2) swapping the locus with a transgene.



**Supplementary Table 1**

|    |                         |                   |
|----|-------------------------|-------------------|
| F1 | GCAACGTGCTGGTTATTGTGC   | mtmg-cagF         |
| F2 | CTCAATCCAGCGGACCTTCC    | mtmg-wpreF        |
| F3 | AGCAAAGACCCCAACGAGAAG   | EGFP-F            |
| F4 | TGTCTGGATCCCATCAAGC     | mtmg-sv40F        |
| F5 | ATGCCCTGGCTCACAATAC     | rb glob pA F      |
| F6 | ACACAGGCATAGAGTGTC      | SV40pA-F          |
| R1 | GATGACGGCCATGTTGTTGTCC  | mtmg-tdtomatoR2   |
| R2 | TTTAACAGAGAGAAGTTCGTGGC | pTV-R             |
| R3 | GGAGCGGGAGAAATGGATATG   | Rosa26-wildtype-R |
| R4 | CGAAAGGCCCGGAGATGAGGAAG | PGKpromR          |
| R5 | TGATCGCGCTTCTCGTTGGG    | EGFP653CSseq      |

**Supplementary Table 2**

|                          |                         |        |
|--------------------------|-------------------------|--------|
| Abcam 13970              | Chicken anti-EGFP       | 1:5000 |
| Abcam 95038              | Goat anti-V5            | 1:1000 |
|                          |                         |        |
| Aves                     | Chicken anti-Myc        | 1:500  |
| BD Pharmingen            | Rat anti-PDGFR $\alpha$ | 1:500  |
|                          |                         |        |
| Calbiochem               | Sheep anti-p53          | 1:1000 |
| Cell Signaling           | rb anti-H3K27Me         | 1:1000 |
| Cell Signaling           | rb anti-Pdgfrb          | 1:500  |
|                          |                         |        |
| Cell Signaling 3724      | Rabbit anti-HA          | 1:2000 |
| Cell Signaling 9308      | Rabbit anti-pRb1        | 1:500  |
| Clontech 9G9             | Mouse anti-tetR         | 1:1000 |
| Clontech 9G9             | rb anti-dsred           | 1:1000 |
| Dawen Cai (Univ of Mich) | Rabbit anti-dsRed       | 1:1000 |
| Dawen Cai (Univ of Mich) | Guinea pig anti-mKate2  | 1:500  |
| Invitrogen 46-0705       | Mouse anti-V5           | 1:1000 |
| Kerafast                 | rat anti-tdtomato       | 1:2000 |
| R&D Systems              | Sheep anti-Dll1         | 1:500  |
| R&D Systems              | Gt anti-Olig2           | 1:500  |
|                          |                         |        |
| Sigma                    | Mouse anti-Flag         | 1:2500 |

**Supplementary Table 1:** Details on the primers used for PCR screening  
**Supplementary Table 2:** Antibodies used in the study
